# Supplementary material for: Transcriptional Profiling of Human Familial Longevity Indicates a Role for ASF1A and IL7R
Source: PLoS One. 2012 Jan 11;7(1):e27759. doi: 10.1371/journal.pone.0027759 (PMC3256132; doi:10.1371/journal.pone.0027759)
Supplement: Table S2 — GO terms found significantly differentially expressed between nonagenarians and controls. Globaltest pathway analysis resulted in 109 Gene Ontology terms of which the expression of the involved probes differed between long-lived nonagenarians and controls (FWER≤0.05). Gene Ontology categories include biological process (BP), molecular function (MF) and cellular component (CC). (XLS) [file pone.0027759.s003.xls]

## Sheet: Suppl Table 2
GO ID	Category	Pathway name	Number of probes tested	FWER
30514	BP	negative regulation of BMP signaling pathway	15	1.59e-07
5605	CC	basal lamina	11	1.42e-06
6958	BP	complement activation, classical pathway	39	1.84e-06
4522	MF	pancreatic ribonuclease activity	13	8.65e-06
50808	BP	synapse organization	10	2.15e-05
6959	BP	humoral immune response	34	2.95e-05
5520	MF	insulin-like growth factor binding	34	4.51e-05
42113	BP	B cell activation	20	5.93e-05
8146	MF	sulfotransferase activity	29	6.83e-05
30225	BP	macrophage differentiation	10	0.00012268
10468	BP	regulation of gene expression	12	0.00015289
43496	BP	regulation of protein homodimerization activity	13	0.00015977
51000	BP	positive regulation of nitric-oxide synthase activity	15	0.00018616
1649	BP	osteoblast differentiation	16	0.00019321
5796	CC	Golgi lumen	11	0.00021723
42060	BP	wound healing	28	0.00062174
9987	BP	cellular process	13	0.00067606
31032	BP	actomyosin structure organization	13	0.00079283
43027	MF	caspase inhibitor activity	12	0.00087769
5159	MF	insulin-like growth factor receptor binding	22	0.00089725
1541	BP	ovarian follicle development	19	0.00099364
1657	BP	ureteric bud development	16	0.0010002
6379	BP	mRNA cleavage	12	0.0013459
8509	MF	anion transmembrane transporter activity	15	0.0015116
4540	MF	ribonuclease activity	21	0.0016195
16525	BP	negative regulation of angiogenesis	23	0.0016308
1836	BP	release of cytochrome c from mitochondria	22	0.0016419
42110	BP	T cell activation	40	0.001861
16126	BP	sterol biosynthetic process	11	0.0019023
17148	BP	negative regulation of translation	17	0.0022811
42100	BP	B cell proliferation	16	0.0024352
16493	MF	C-C chemokine receptor activity	19	0.0024708
19955	MF	cytokine binding	16	0.0028306
5543	MF	phospholipid binding	47	0.0028695
9953	BP	dorsal/ventral pattern formation	35	0.0031651
45028	MF	purinergic nucleotide receptor activity, G-protein coupled	24	0.0032307
42733	BP	embryonic digit morphogenesis	13	0.0033765
42169	MF	SH2 domain binding	38	0.003459
43011	BP	myeloid dendritic cell differentiation	11	0.0037739
50690	BP	regulation of defense response to virus by virus	12	0.00479
32583	BP	regulation of gene-specific transcription	11	0.0048744
5003	MF	ephrin receptor activity	13	0.0048893
45087	BP	innate immune response	116	0.0052681
42177	BP	negative regulation of protein catabolic process	16	0.0053608
50680	BP	negative regulation of epithelial cell proliferation	19	0.0055482
48754	BP	branching morphogenesis of a tube	22	0.0057141
6895	BP	Golgi to endosome transport	15	0.0061644
5938	CC	cell cortex	44	0.006607
2020	MF	protease binding	23	0.0072464
2755	BP	MyD88-dependent toll-like receptor signaling pathway	10	0.007348
51881	BP	regulation of mitochondrial membrane potential	10	0.0076627
1890	BP	placenta development	19	0.0077502
7270	BP	nerve-nerve synaptic transmission	10	0.0077812
7612	BP	learning	24	0.0078166
51216	BP	cartilage development	35	0.0078618
42493	BP	response to drug	61	0.0079564
9982	MF	pseudouridine synthase activity	15	0.0081581
42475	BP	odontogenesis of dentine-containing tooth	32	0.0085219
60048	BP	cardiac muscle contraction	22	0.0090467
7498	BP	mesoderm development	27	0.0097686
5523	MF	tropomyosin binding	18	0.010155
46902	BP	regulation of mitochondrial membrane permeability	13	0.011496
8253	MF	5'-nucleotidase activity	13	0.011558
5178	MF	integrin binding	77	0.012226
30198	BP	extracellular matrix organization	39	0.012655
6919	BP	caspase activation	57	0.012966
45909	BP	positive regulation of vasodilation	14	0.013045
6584	BP	catecholamine metabolic process	12	0.013207
8134	MF	transcription factor binding	191	0.014522
9636	BP	response to toxin	19	0.014847
30041	BP	actin filament polymerization	21	0.015411
4931	MF	ATP-gated cation channel activity	12	0.016341
1614	MF	purinergic nucleotide receptor activity	12	0.016341
7184	BP	SMAD protein nuclear translocation	11	0.017984
50897	MF	cobalt ion binding	19	0.019715
15630	CC	microtubule cytoskeleton	29	0.019967
6220	BP	pyrimidine nucleotide metabolic process	10	0.020188
51056	BP	regulation of small GTPase mediated signal transduction	65	0.020937
48662	BP	negative regulation of smooth muscle cell proliferation	16	0.022035
30155	BP	regulation of cell adhesion	38	0.022315
45596	BP	negative regulation of cell differentiation	25	0.024417
4571	MF	mannosyl-oligosaccharide 1,2-alpha-mannosidase activity	14	0.024989
9887	BP	organ morphogenesis	183	0.025032
16563	MF	transcription activator activity	190	0.02602
8016	BP	regulation of heart contraction	54	0.026215
30111	BP	regulation of Wnt receptor signaling pathway	21	0.028435
42102	BP	positive regulation of T cell proliferation	28	0.028694
6821	BP	chloride transport	62	0.029552
15026	MF	coreceptor activity	26	0.029783
51592	BP	response to calcium ion	17	0.030203
45821	BP	positive regulation of glycolysis	18	0.032515
80	BP	G1 phase of mitotic cell cycle	13	0.033225
5125	MF	cytokine activity	135	0.03361
226	BP	microtubule cytoskeleton organization	38	0.034151
5158	MF	insulin receptor binding	37	0.035478
16331	BP	morphogenesis of embryonic epithelium	12	0.036708
7205	BP	activation of protein kinase C activity	37	0.038762
4867	MF	serine-type endopeptidase inhibitor activity	120	0.038934
4745	MF	retinol dehydrogenase activity	14	0.038934
8015	BP	blood circulation	68	0.039285
17119	CC	Golgi transport complex	16	0.039739
4143	MF	diacylglycerol kinase activity	20	0.040938
10524	BP	positive regulation of calcium ion transport into cytosol	12	0.043364
32760	BP	positive regulation of tumor necrosis factor production	10	0.044013
2062	BP	chondrocyte differentiation	11	0.044013
45861	BP	negative regulation of proteolysis	10	0.0443
55007	BP	cardiac muscle cell differentiation	10	0.046271
1837	BP	epithelial to mesenchymal transition	26	0.046516
17048	MF	Rho GTPase binding	17	0.047589
